# Supplementary material for: Renal Proximal Tubule Cell Cannabinoid-1 Receptor Regulates Bone Remodeling and Mass via a Kidney-to-Bone Axis
Source: MDPI journal article supplement (doi:10.3390/cells10020414), 2021-02-17
Supplement: s1 [file s1]

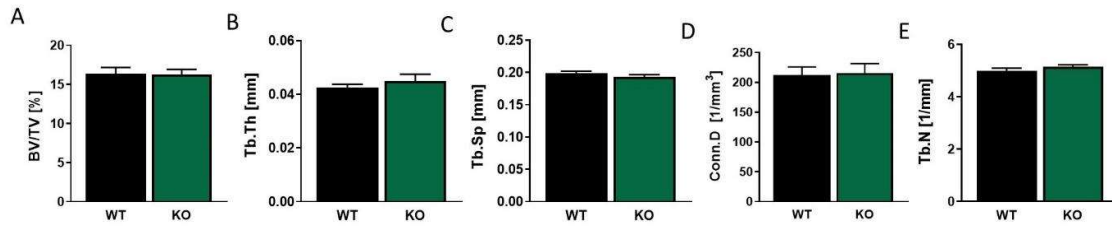

**Supplementary Figure 1. Effect of CB<sub>1</sub>R nullification in RPTCs on vertebral parameters.** Analysis of bone volume density of L3 vertebrae (BV/TV) values (A), L3 Trabecular thickness (Tb.Th; B), L3 Trabecular spacing (Tb.Sp; C), L3 Connectivity density (Conn.D; D), and L3 Trabecular number (Tb.N; E). Data represent the mean  $\pm$  SEM from 10-14 animals per group.

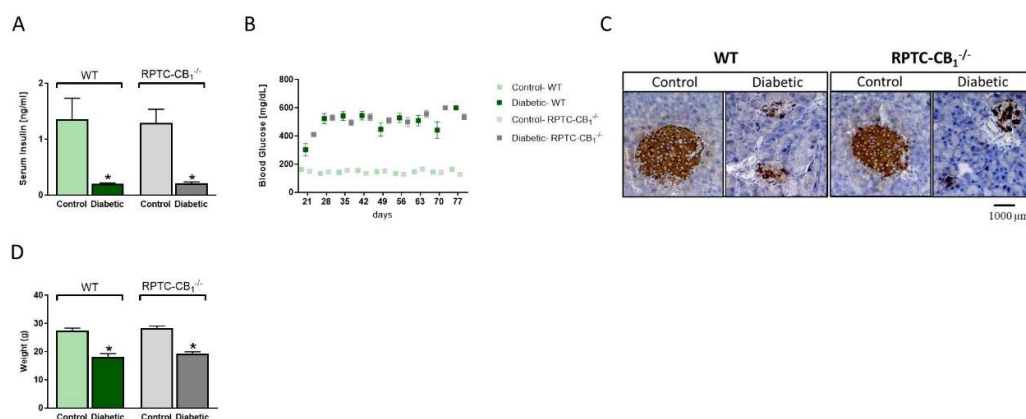

**Supplementary Figure 2. Induction of T1D in mice lacking CB<sub>1</sub>R in RPTCs by using STZ.** Serum insulin levels (**A**), Blood glucose (**B**), Representative insulin staining of the pancreas from each treatment group (**C**), and body weight (**D**). Data represent the mean ± SEM from 8-13 animals per group. \* $P < 0.05$  vs. non-diabetic control mice in each mouse strain.

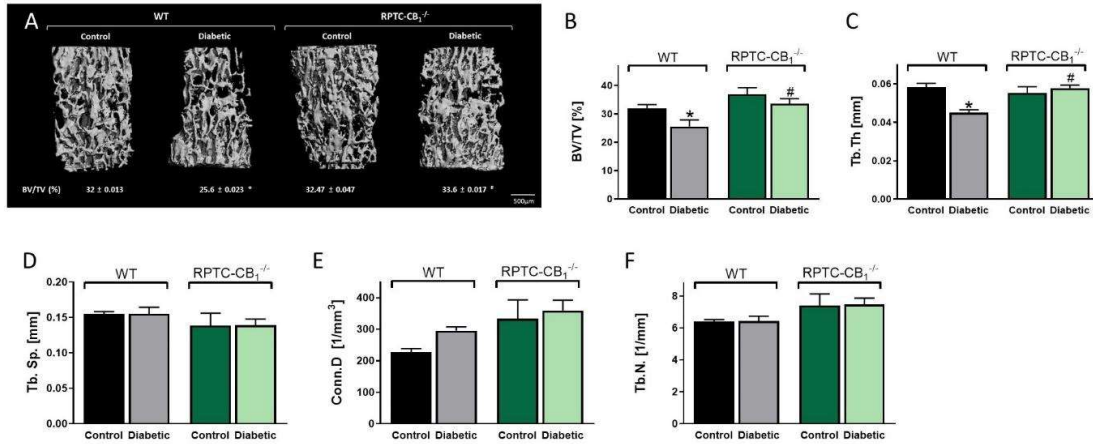

**Supplementary Figure 3. Effect of CB<sub>1</sub>R nullification in RPTCs on vertebral parameters under hyperglycemic conditions.** 3D images of the vertebrae of mice with median BV/TV values (A), Analysis of the bone volume density of L3 vertebrae (BV/TV) values (B), L3 trabecular thickness (Tb.Th; C), L3 trabecular spacing (Tb.Sp; D), L3 connectivity density (Conn.D; E), and L3 trabecular number (Tb.N; F). Data represent the mean ± SEM from 8–13 animals per group. \* $P < 0.05$  vs. non-diabetic WT control mice, # $P < 0.05$  vs. diabetic WT mice.

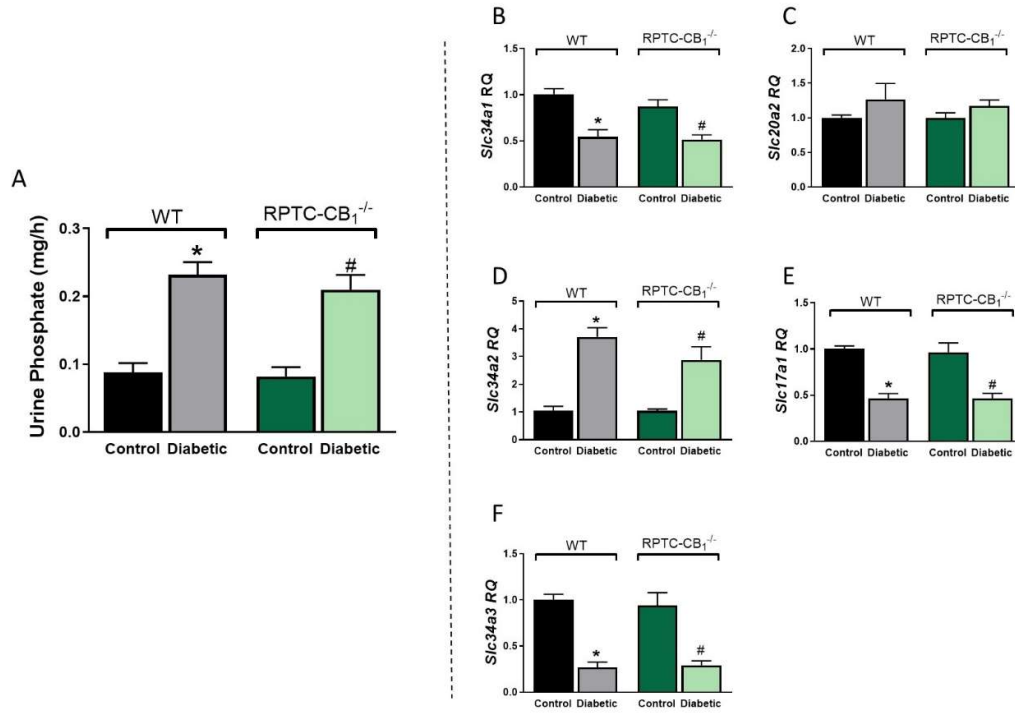

**Supplementary Figure 4. Effect of CB<sub>1</sub>R nullification in RPTCs on phosphate renal reabsorption.** Urine Phosphate Levels (A). Analysis of gene expression levels of various renal phosphate transporters (B-F). Data represent the mean ± SEM from 8-13 animals per group. \* $P < 0.05$  vs. nondiabetic WT control mice, # $P < 0.05$  vs. nondiabetic RPTC-CB<sub>1</sub>R KO mice.

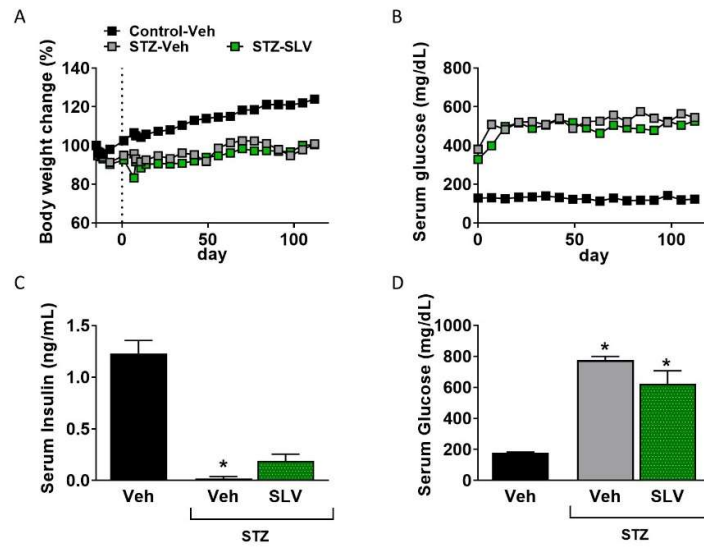

**Supplementary Figure 5. The effect of CB<sub>1</sub>R blockade on body weight and glucose homeostasis in T1D.** Body weight and serum glucose changes in control animals treated orally with Veh in comparison to diabetic mice treated orally with SLV-319 (3 mg/kg), or Veh for 16 weeks (**A**, **B**). Serum insulin (**C**) and glucose levels (**D**) after 16 weeks of treatment. Data represent the mean  $\pm$  SEM from 8-10 mice per group. \* $P < 0.05$  relative to the corresponding control group treated with Veh.

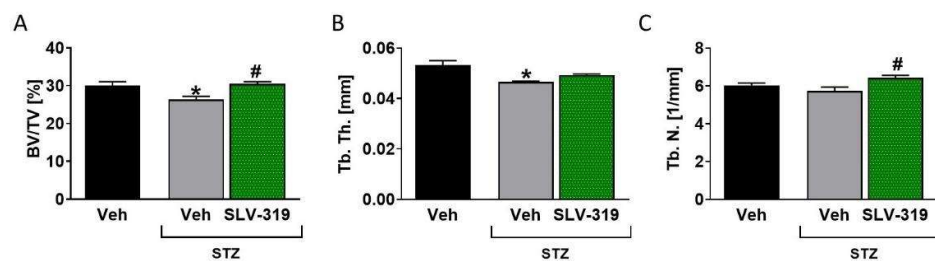

**Supplementary Figure 6. Chronic CB<sub>1</sub>R blockade prevents diabetes-induced vertebral bone loss.**

Analysis of the bone volume density of L3 vertebrae (BV/TV) values (A), L3 trabecular thickness (Tb.Th; B), and L3 trabecular number (Tb.N; C). Data represent the mean  $\pm$  SEM from 8-10 mice per group. \* $P$ <0.05 relative to the corresponding control group treated with Veh, # $P$ <0.05 relative to the corresponding STZ group treated with Veh.
